# Supplementary material
Source: PubMed Central journal article supplement (PMC3248000)
Supplement: supp_M111.303891_jbc.M111.303891-2.pdf [file supp_M111.303891_jbc.M111.303891-2.pdf]

## FIGURE LEGEND

Supplemental Fig. 1 Disaccharide analysis of glycosaminoglycans from embryo derived mast cells. Heparin/HS (A) and chondroitin sulfate (B) disaccharide composition was determined by RPIP-HPLC. Mean values  $\pm$  SEM were calculated from separate analyses of glycosaminoglycans from four WT (black staples), six NDST1<sup>+/-</sup> (grey staples) and two NDST1<sup>-/-</sup> MC cultures (white staples). (A) NAc, HexA-GlcNAc; NS, HexA-GlcNS; 6S, HexA-GlcNAc(6OS); 2S, HexA(2OS)-GlcNAc; NS6S, HexA-GlcNS(6OS); NS2S, HexA(2OS)-GlcNS; NS6S2S, HexA(2OS)-GlcNS(6OS). (B) Non-S, HexA-GalNAc; 6S, HexA-GalNAc(6OS); 4S, HexA-GalNAc(4OS); 6S4S, HexA-GalNAc(di-OS)
