# Supplementary material
Source: PubMed Central journal article supplement (PMC3248000)

**A**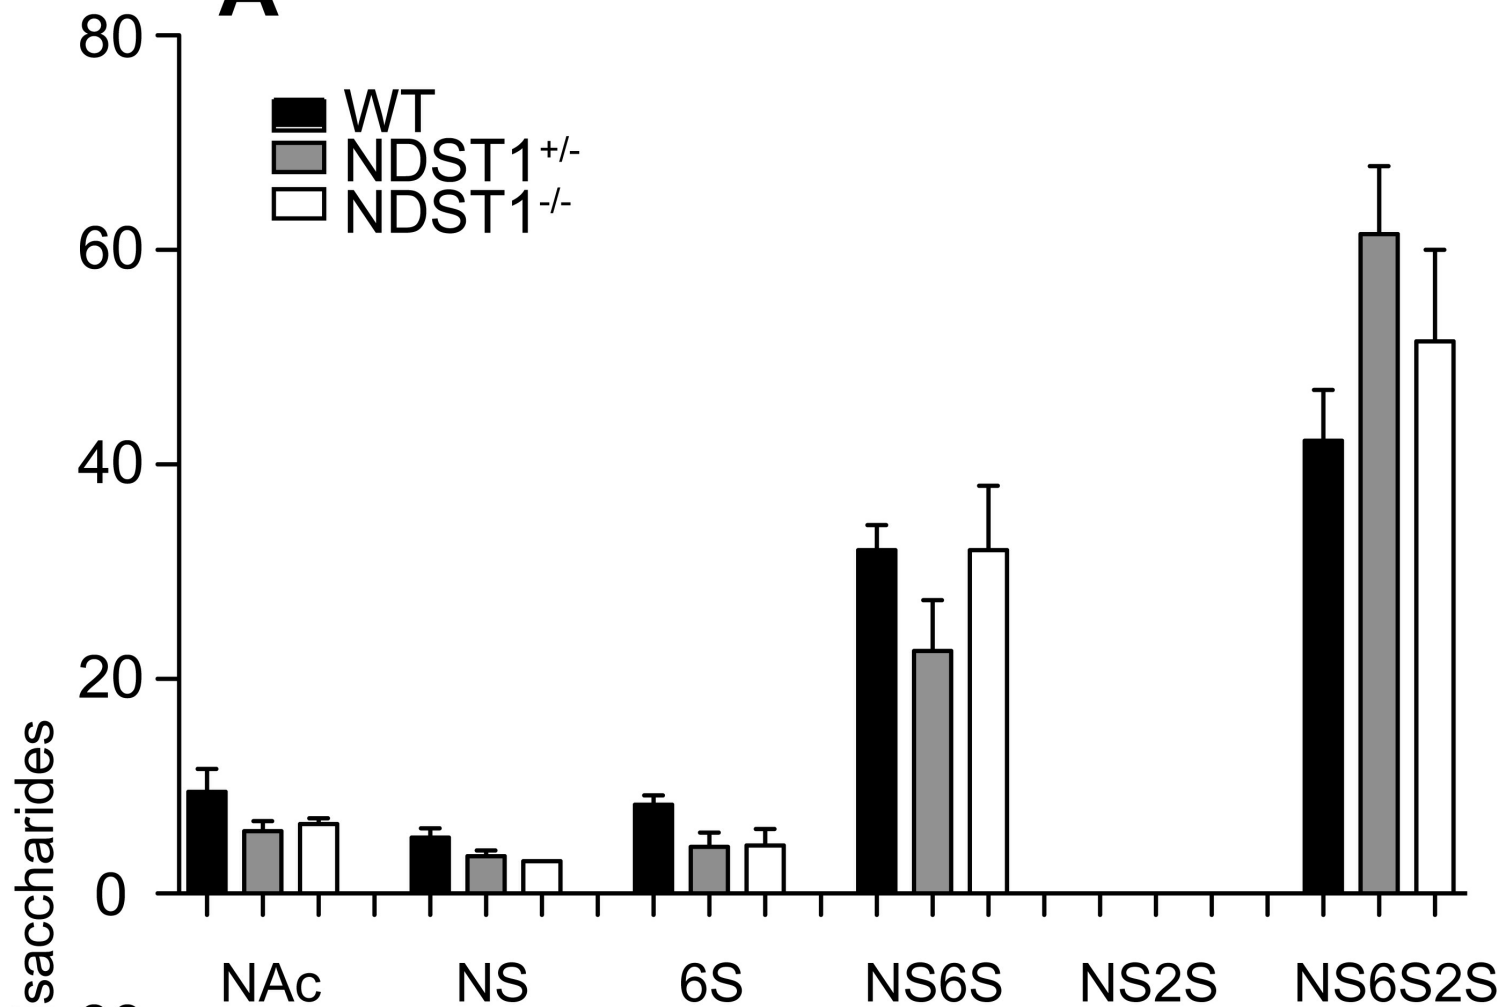**B**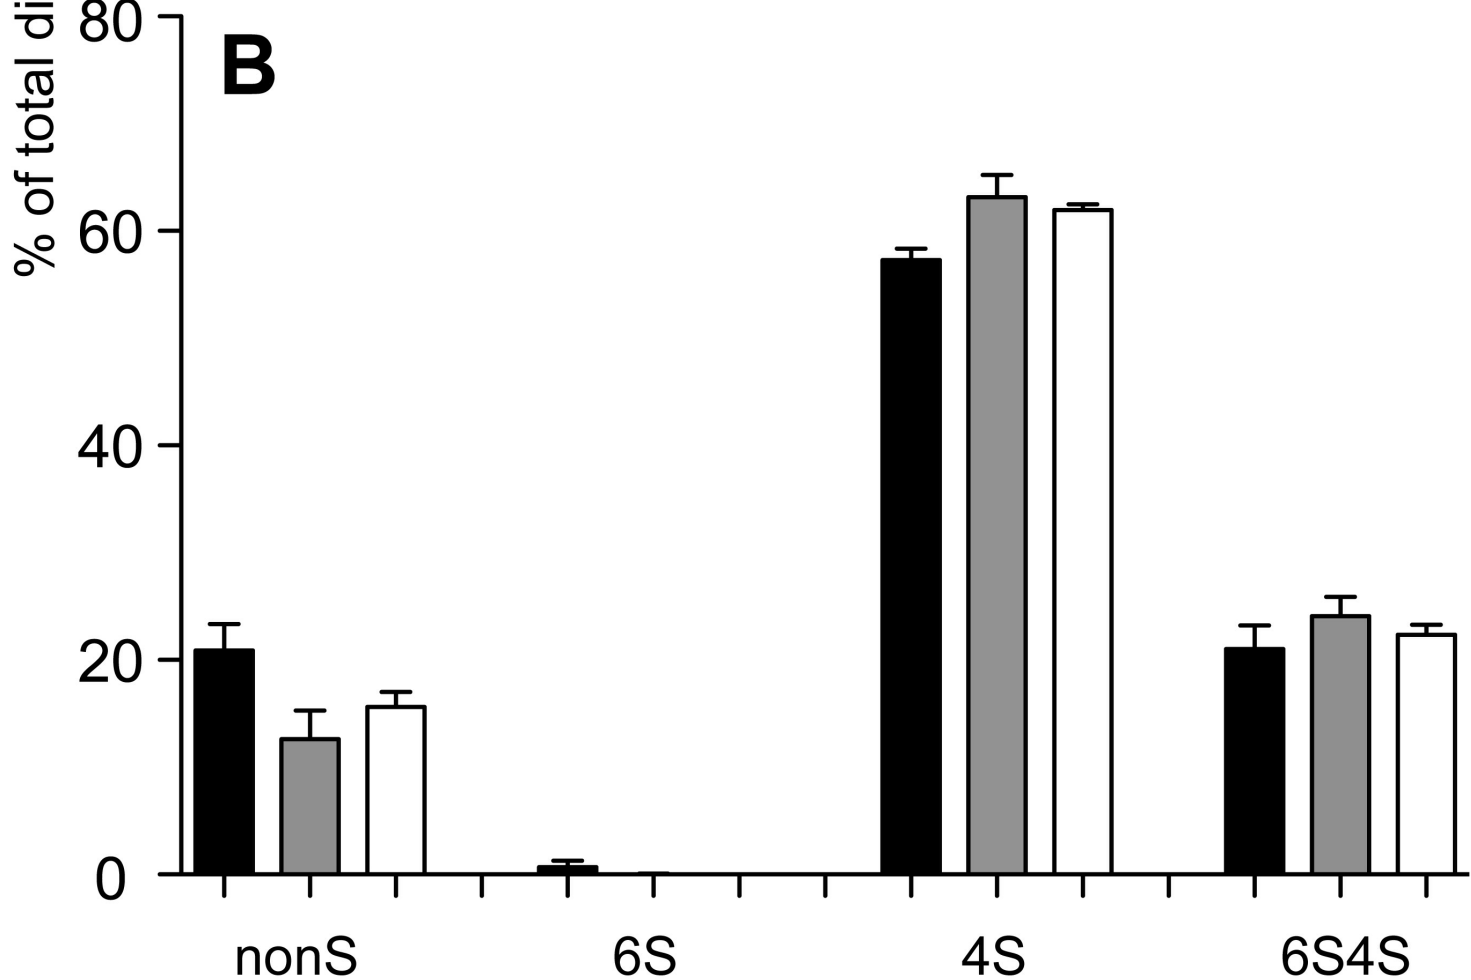

Supplement: supp_M111.303891_jbc.M111.303891-1.pdf [file supp_M111.303891_jbc.M111.303891-1.pdf]
